# Supplementary material
Source: PubMed Central journal article supplement (PMC2970579)
Supplement: supp_djq392_JNCI-09-1222-s01.pdf [file supp_djq392_JNCI-09-1222-s01.pdf]

**Supplemental Table 1. Genotype frequencies of *GSTA4* tag SNPs among NMSC cases and control subjects.**

| SNP ID     | Position on Chr6 | Structural Location within or near <i>Gsta4</i> | Genotype | Frequency |            |
|------------|------------------|-------------------------------------------------|----------|-----------|------------|
|            |                  |                                                 |          | Controls  | NMSC Cases |
| rs7773621  | 52971659         | near 5' end of gene                             | A/A      | 0.533     | 0.536      |
|            |                  |                                                 | A/G      | 0.380     | 0.369      |
|            |                  |                                                 | G/G      | 0.087     | 0.095      |
| rs182623   | 52969817         | near 5' end of gene                             | A/A      | 0.514     | 0.513      |
|            |                  |                                                 | A/T      | 0.399     | 0.392      |
|            |                  |                                                 | T/T      | 0.087     | 0.094      |
| rs16883343 | 52968334         | near 5' end of gene                             | C/C      | 0.555     | 0.561      |
|            |                  |                                                 | C/T      | 0.357     | 0.388      |
|            |                  |                                                 | T/T      | 0.089     | 0.051      |
| rs2274760  | 52958114         | intron 4                                        | C/C      | 0.011     | 0.029      |
|            |                  |                                                 | C/G      | 0.192     | 0.202      |
|            |                  |                                                 | G/G      | 0.797     | 0.769      |
| rs669674   | 52957999         | intron 4                                        | A/A      | 0.011     | 0.015      |
|            |                  |                                                 | A/G      | 0.126     | 0.183      |
|            |                  |                                                 | G/G      | 0.863     | 0.803      |
| rs17614871 | 52951717         | intron 6                                        | A/A      | 0.072     | 0.071      |
|            |                  |                                                 | A/T      | 0.293     | 0.302      |
|            |                  |                                                 | T/T      | 0.635     | 0.627      |
| rs3734431  | 52951388         | intron 6                                        | A/A      | 0.829     | 0.835      |
|            |                  |                                                 | A/G      | 0.162     | 0.160      |
|            |                  |                                                 | G/G      | 0.009     | 0.005      |
| rs367836   | 52951090         | 3' UTR                                          | A/A      | 0.370     | 0.354      |
|            |                  |                                                 | A/C      | 0.458     | 0.449      |
|            |                  |                                                 | C/C      | 0.172     | 0.197      |
| rs17614751 | 52950808         | 3' UTR                                          | A/A      | 0.002     | 0.002      |
|            |                  |                                                 | A/G      | 0.142     | 0.110      |
|            |                  |                                                 | G/G      | 0.856     | 0.888      |
| rs7496     | 52950798         | 3' UTR                                          | A/A      | 0.030     | 0.027      |
|            |                  |                                                 | A/G      | 0.214     | 0.168      |
|            |                  |                                                 | G/G      | 0.760     | 0.810      |
| rs405729   | 52950740         | 3' UTR                                          | A/A      | 0.241     | 0.254      |
|            |                  |                                                 | A/G      | 0.474     | 0.466      |
|            |                  |                                                 | G/G      | 0.285     | 0.281      |
| rs378775   | 52949438         | near 3' end of gene                             | C/C      | 0.047     | 0.053      |
|            |                  |                                                 | C/G      | 0.311     | 0.314      |
|            |                  |                                                 | G/G      | 0.642     | 0.633      |
| rs17608261 | 52944656         | near 3' end of gene                             | C/G      | 0.094     | 0.090      |
|            |                  |                                                 | G/G      | 0.906     | 0.910      |
